# Supplementary material for: Upregulation of HLA‐II related to LAG‐3+CD4+ T cell infiltration is associated with patient outcome in human glioblastoma
Source: PubMed Central journal article supplement — Cancer Sci. 2024 Mar 13;115(5):1388–404. doi: 10.1111/cas.16128 (PMC11093187; doi:10.1111/cas.16128), 2024-03-13
Supplement: CAS-115-1388-s001.pdf [file CAS-115-1388-s001.pdf]

**Fig1**

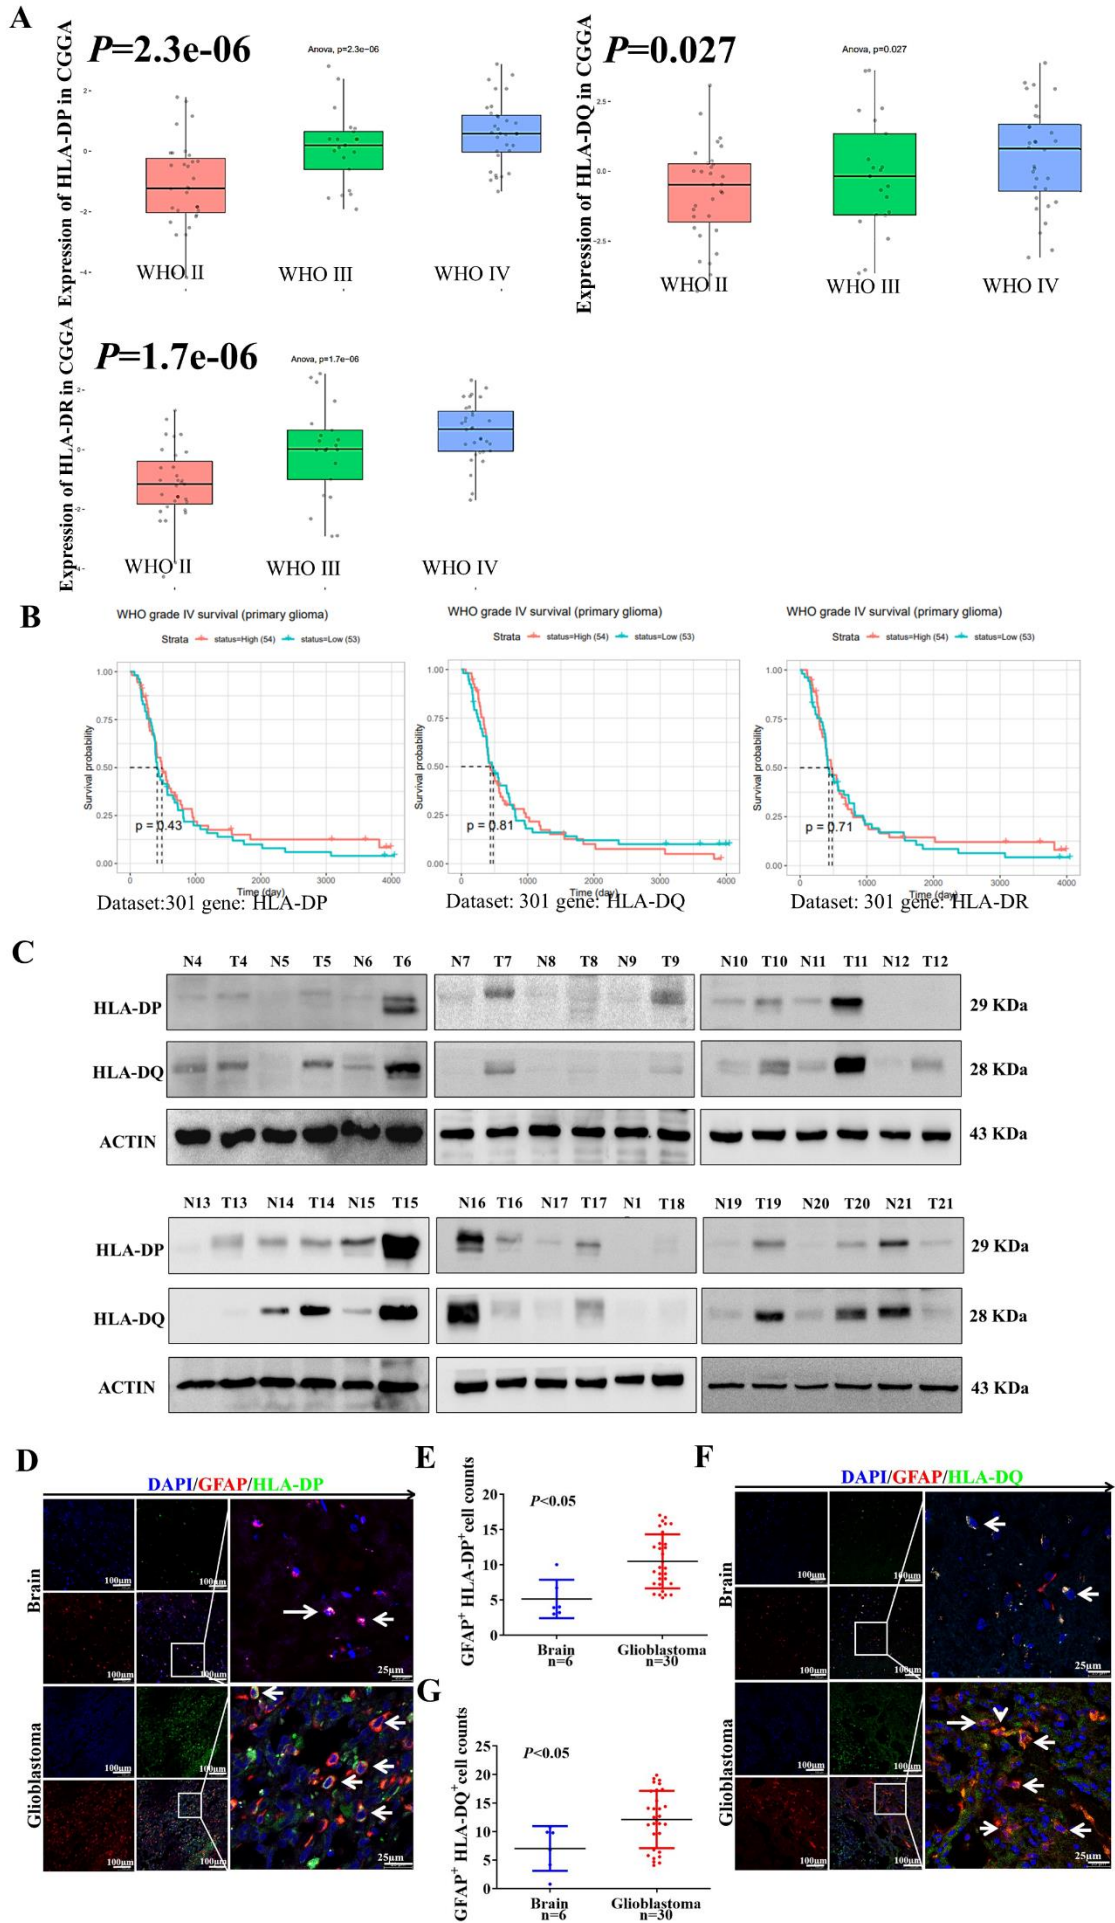

**Supplementary Figure 1. Evaluation of HLA-II expression in GBM samples.**

(A) The expression of HLA-II in GBM was shown from the Chinese Glioma Genome Atlas (CGGA). (B) Association between HLA-DP, HLA-DQ, and HLA-DR expression and survival follow-up time in CGGA datasets. (C) Fresh tumor tissues and peritumoral brain tissues were collected, and the expression of HLA-II was measured by western blot. (D, F) 30 cases of frozen GBM and 6 cases of control samples were collected, representative immunofluorescence images indicate HLA-II expression in GFAP<sup>+</sup> GBM cells. White arrows point to the colocalized cells. (E, G) The comparison of HLA-DP<sup>+</sup>GFAP<sup>+</sup> and HLA-DQ<sup>+</sup>GFAP<sup>+</sup> between GBM and control tissues was shown.

**Fig2**

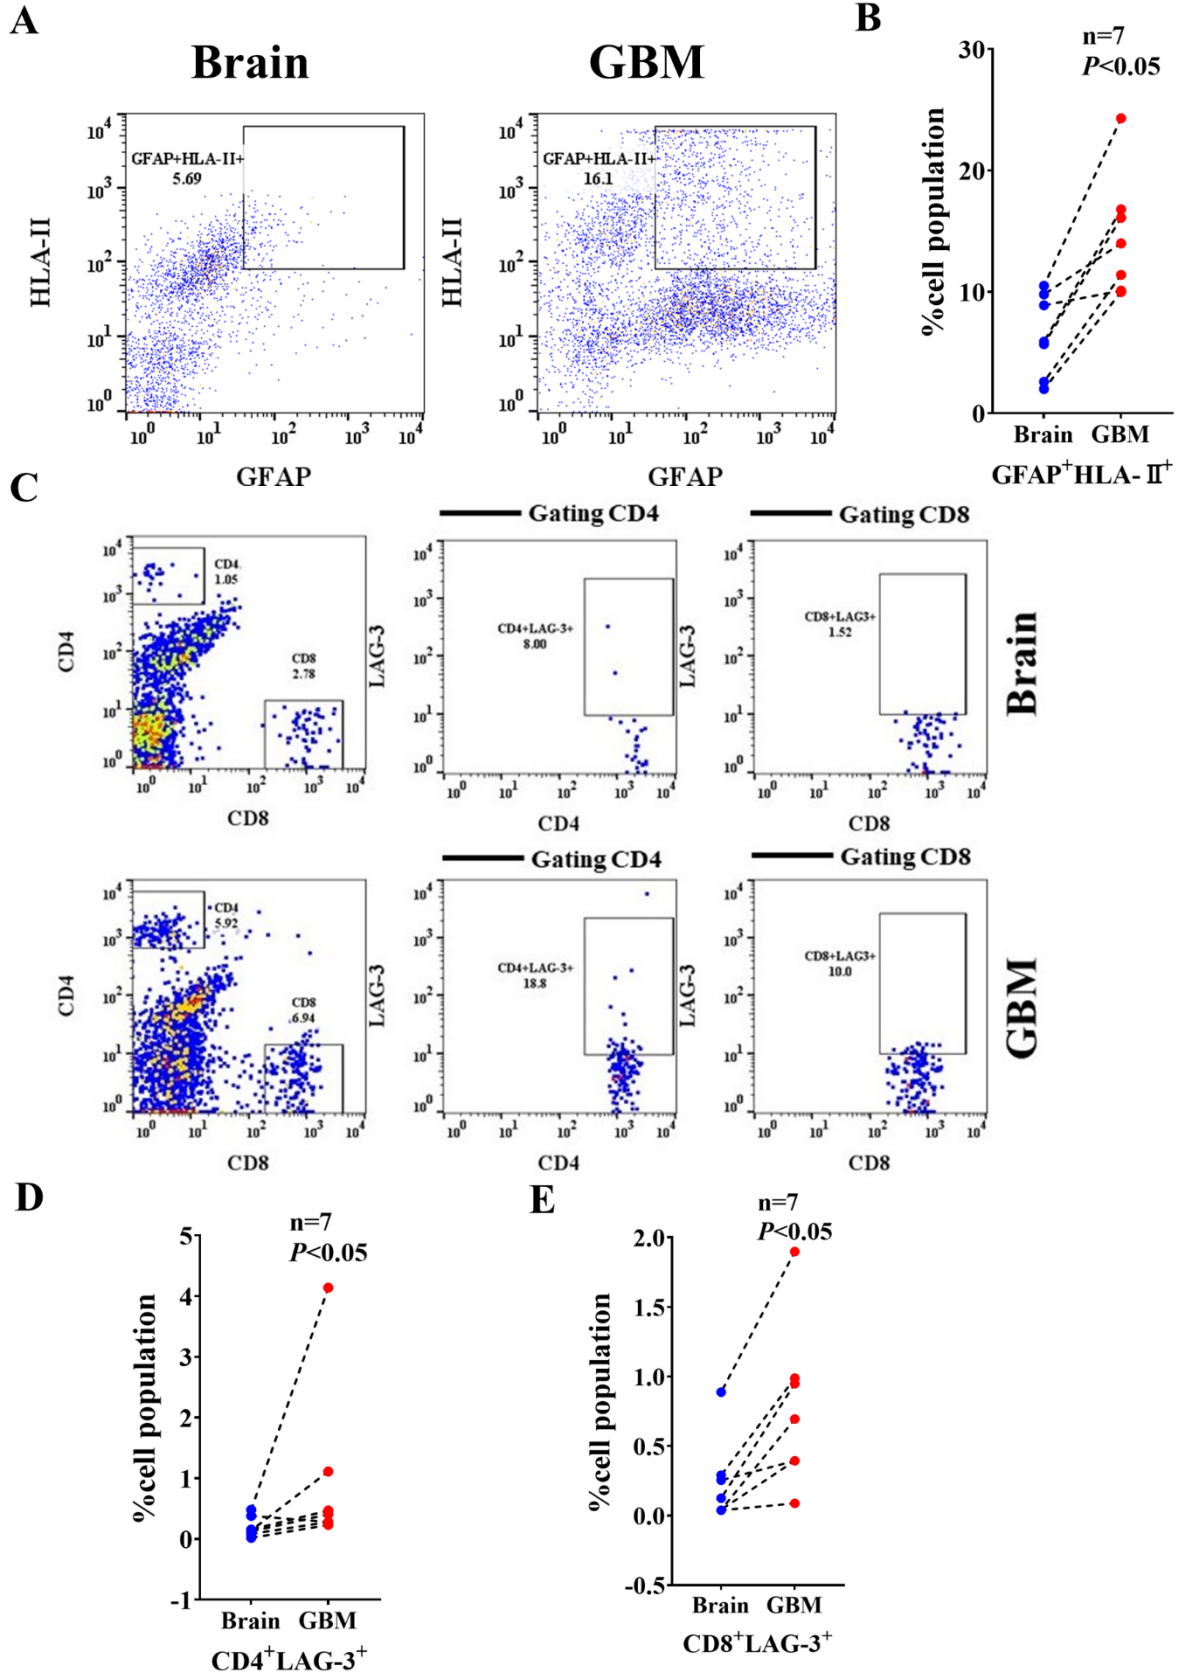

**Supplementary Figure 2. FCM analysis of HLA-II<sup>+</sup>GFAP<sup>+</sup> population, LAG-3<sup>+</sup>CD4<sup>+</sup> and LAG-3<sup>+</sup>CD8<sup>+</sup> T cells in human GBM.** 7 pairs of fresh GBM and adjacent brain samples were processed for FCM analysis. (A) FCM analysis shows the percentage of HLA-II<sup>+</sup>GFAP<sup>+</sup> cells in human GBM and adjacent brain tissues. (B) The percentage of HLA-II<sup>+</sup>GFAP<sup>+</sup> cells in human GBM is higher than that in adjacent brain tissues. (C) FCM analysis shows the population of CD4<sup>+</sup>, CD8<sup>+</sup>, LAG-3<sup>+</sup>CD4<sup>+</sup> and LAG<sup>+</sup>CD8<sup>+</sup> T cells in human GBM and adjacent brain tissues. The percentage of LAG-3<sup>+</sup>CD4<sup>+</sup> cells (D) and LAG-3<sup>+</sup>CD8<sup>+</sup> (E) in human GBM is higher than that in adjacent brain.

**Fig3**

**A**

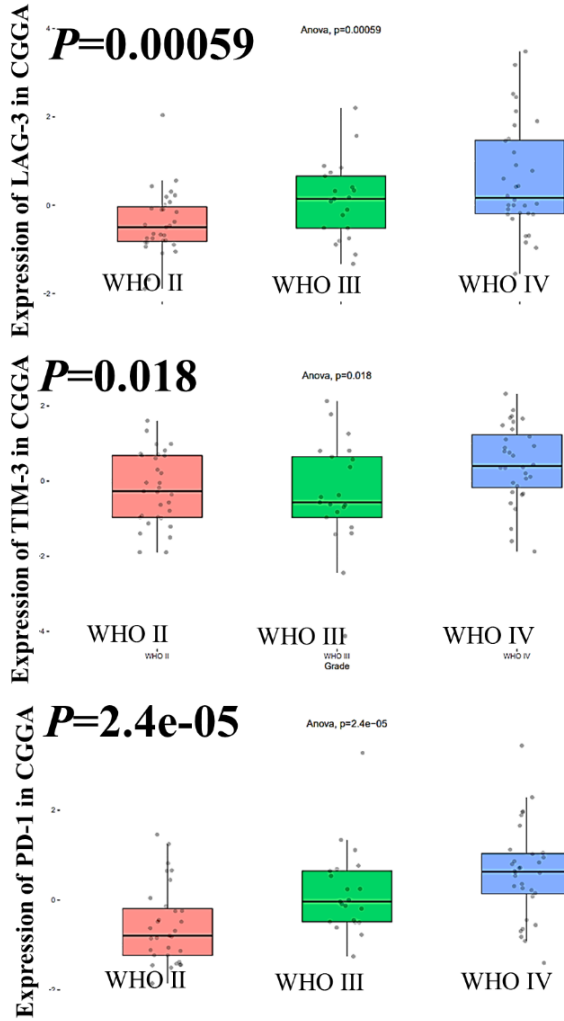

**B**

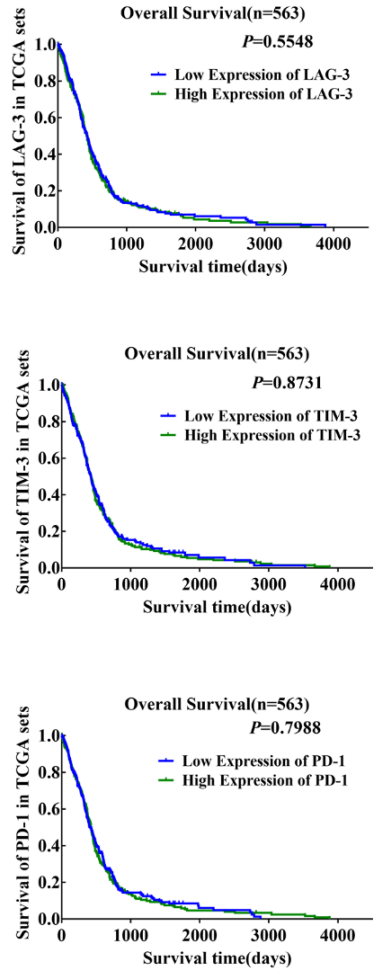

**C**

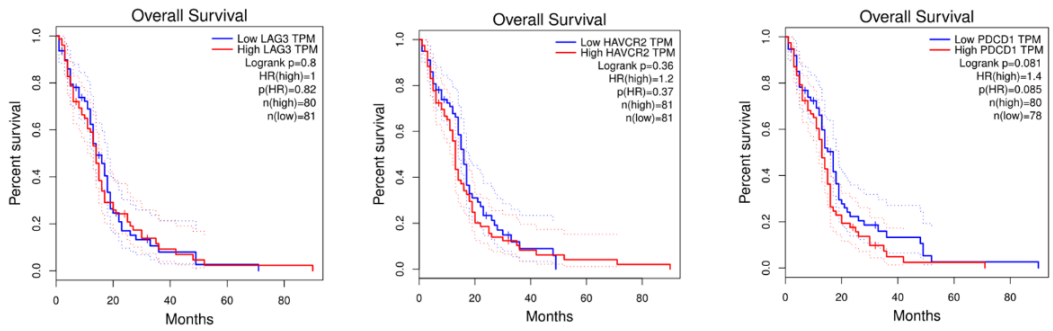

**D**

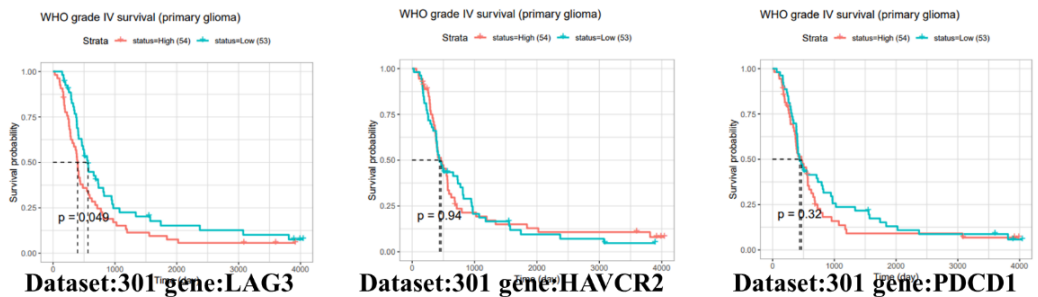

**Supplementary Figure 3. Relationship between immune checkpoint molecules and patient survival outcomes in the TCGA and CGGA datasets. (A) The expression of LAG-3, TIM-3, and PD-1 in GBM from CGGA was shown. Oncomine (B) and GEPIA (C) database from TCGA and the data from CGGA (D) showed Kaplan-Meier curves for overall survival, according to the expression of LAG-3, TIM-3, and PD-1 at mRNA level in GBM.**

**Fig4**

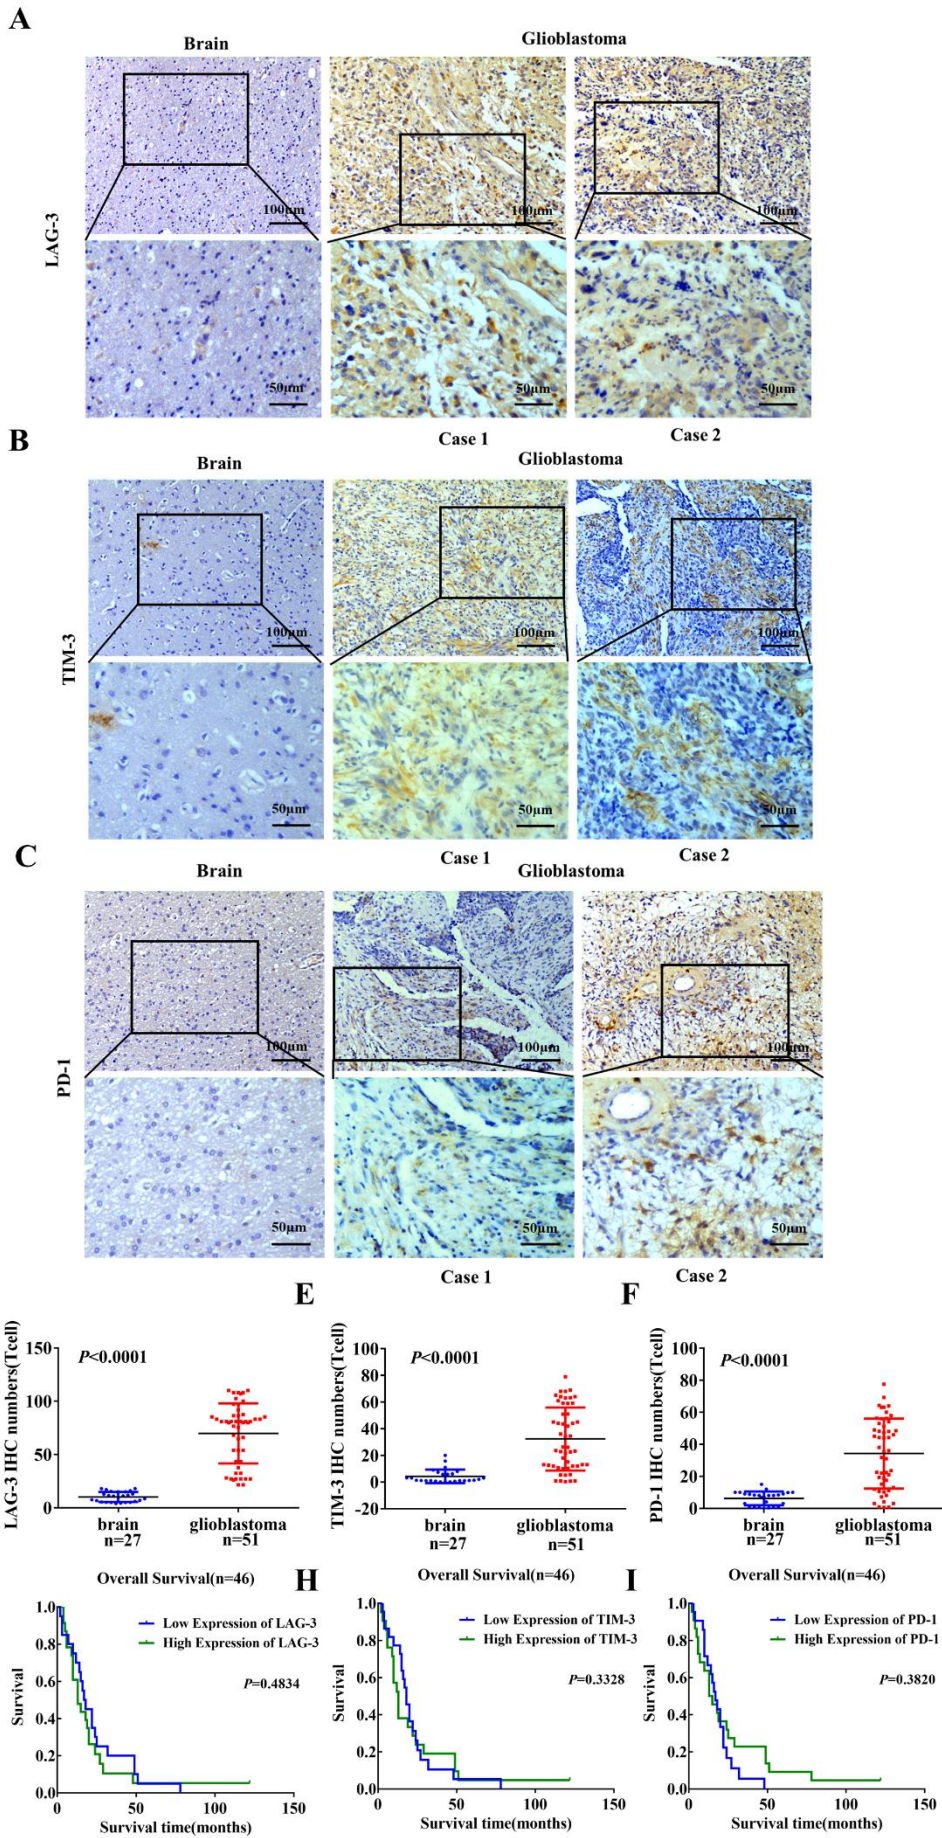

**Supplementary Figure 4. Overall survival analysis according to the expression of LAG-3, TIM-3, and PD-1 in GBM.** (A-C) Representative IHC images of LAG-3, TIM-3, and PD-1 staining in paraffin GBM specimens are shown (51 cases of GBM and 27 control brain tissues). (D-F) Infiltrated cells number of LAG-3<sup>+</sup>, TIM-3<sup>+</sup>, and PD-1<sup>+</sup> cells was shown (n=51). (G-I) The median of LAG-3, TIM-3, and PD-1 positive cells was used as cutoff point to split the GBM into high/low groups, and OS of patients was shown according to the expression of LAG-3, TIM-3, and PD-1 paraffin GBM specimens (n=46).



Fig 5

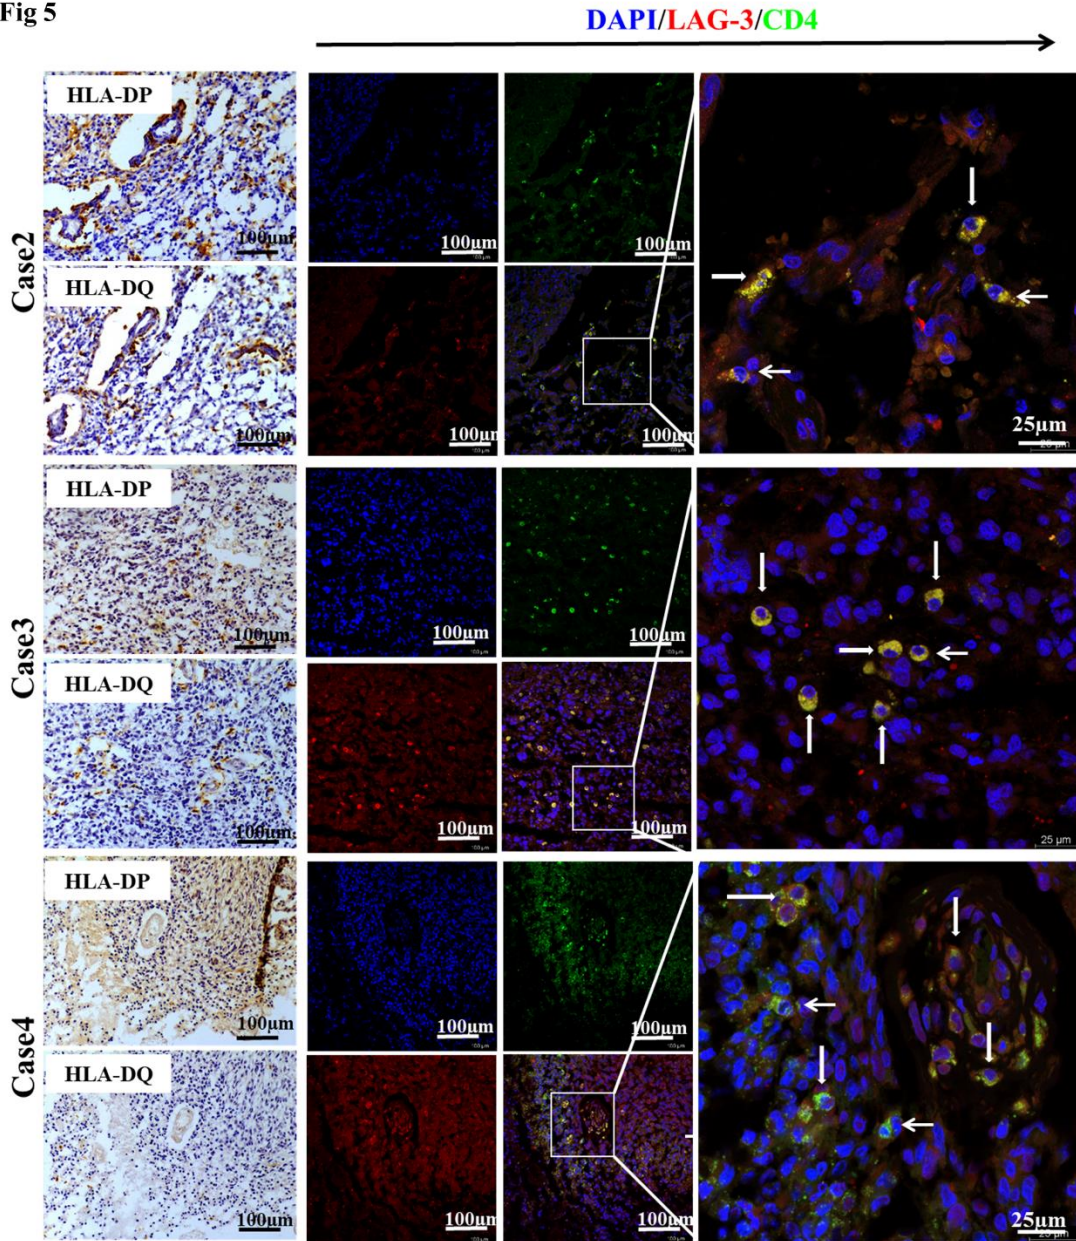

**Supplementary Figure 5.** Immunofluorescence staining images indicated LAG-3<sup>+</sup>CD4<sup>+</sup> cells infiltration in the tumor stroma, which is associated with HLA-DP and HLA-DQ expression. White arrows point to the colocalized cells.

Fig6

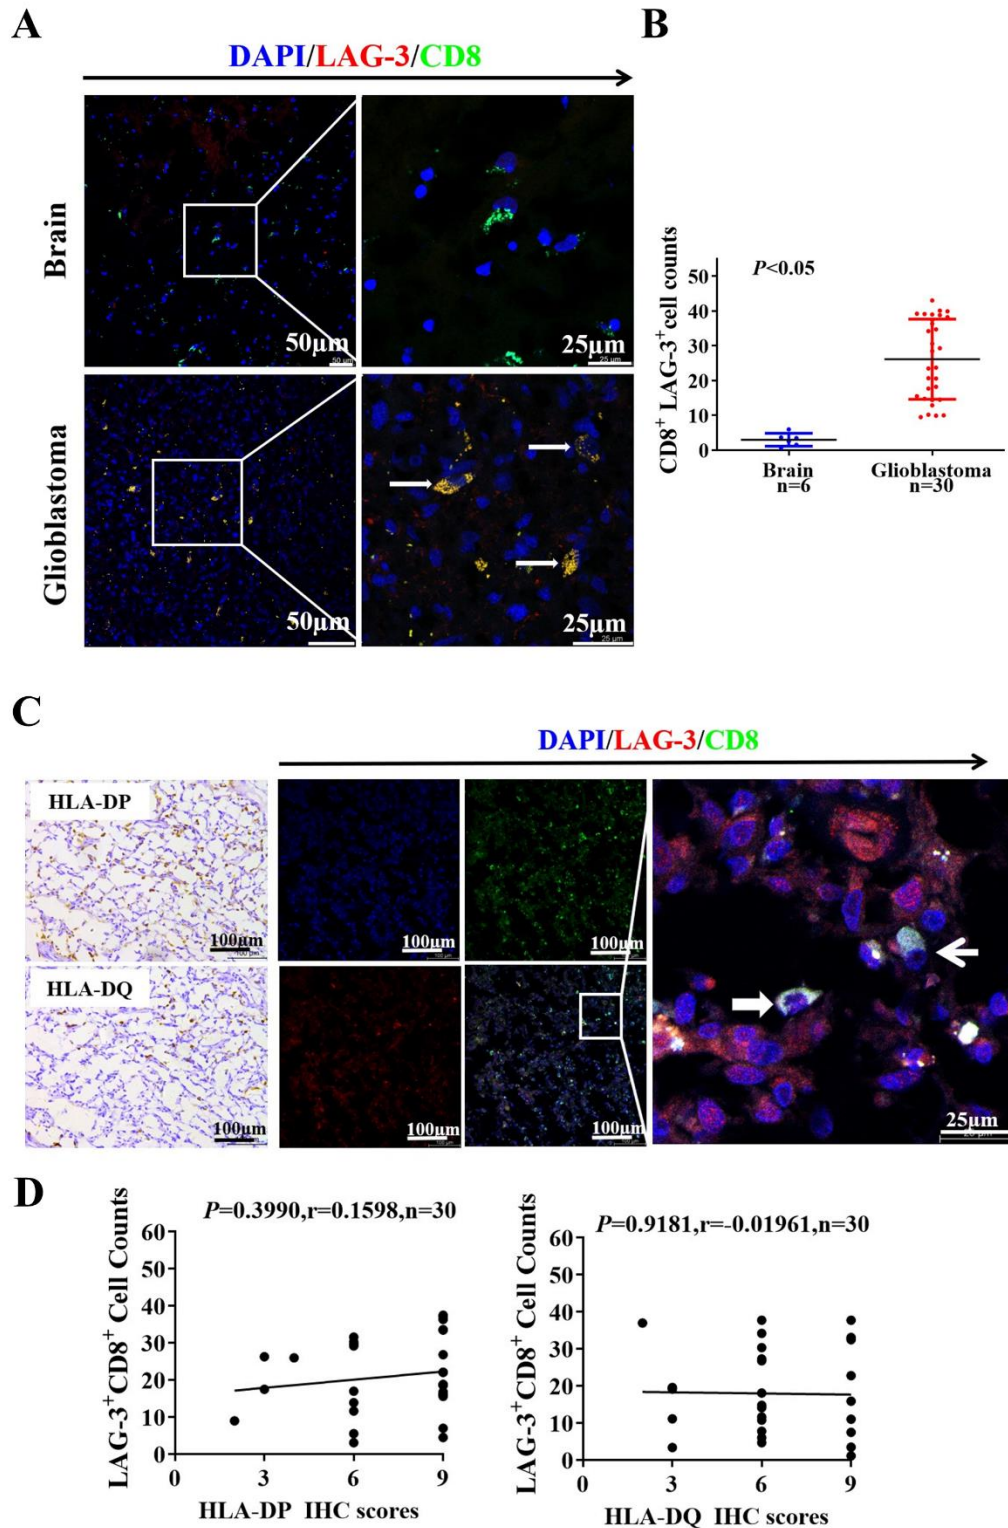

Supplementary Figure 6. Immunofluorescence staining indicated the infiltration of CD8<sup>+</sup>LAG-3<sup>+</sup> T cells in GBM. (A) Representative immunofluorescence images indicate CD8<sup>+</sup>LAG-3<sup>+</sup> T cells infiltration. White arrows point to the colocalized cells.

(B) The comparison of CD8<sup>+</sup>LAG-3<sup>+</sup> T cells between GBM and control tissues was shown. (C) Immunofluorescence images indicated CD8<sup>+</sup>LAG-3<sup>+</sup> cells infiltration in the tumor stroma, which is associated with HLA-DP and HLA-DQ expression. White arrows point to the colocalized cells. (D) The correlation between HLA-II expression and the number of CD8<sup>+</sup>LAG-3<sup>+</sup> T cells was shown.

**Fig 7**

**A**

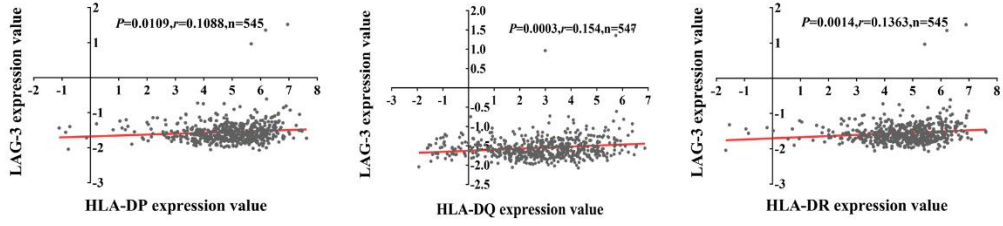

**B**

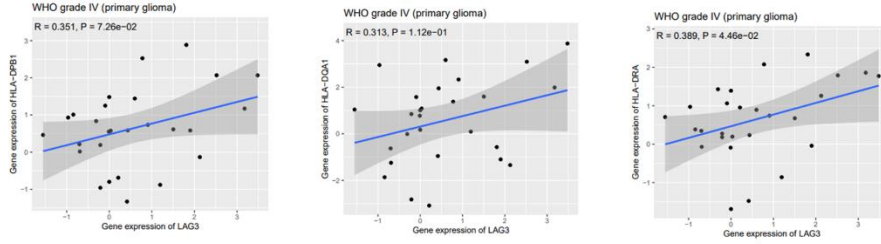

**C**

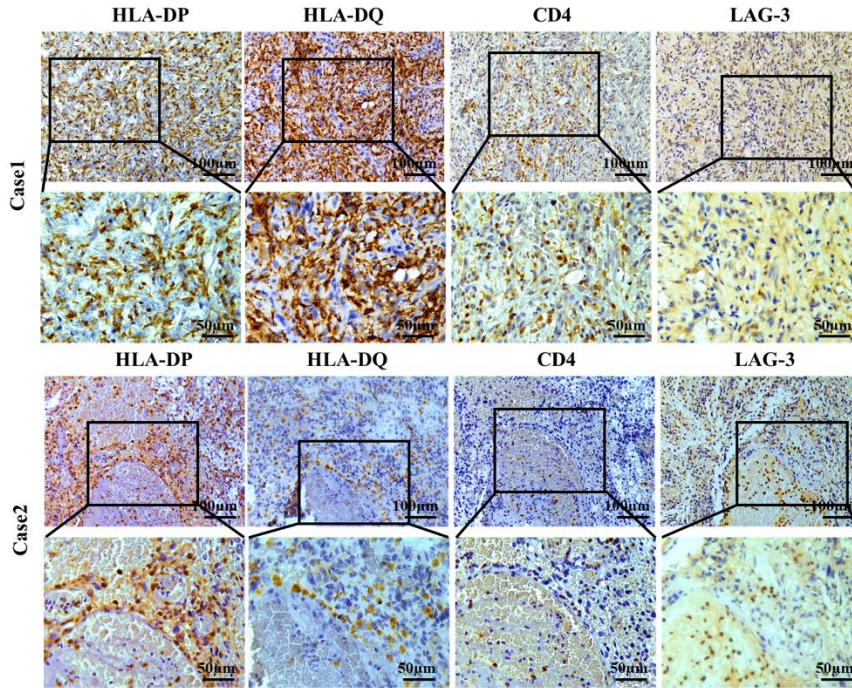

**D**

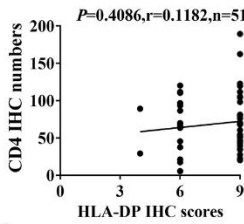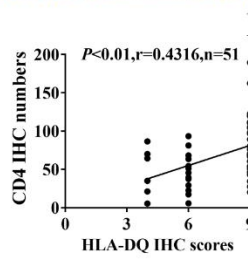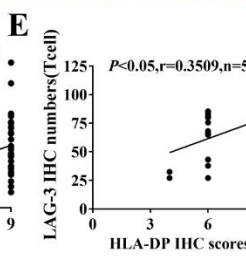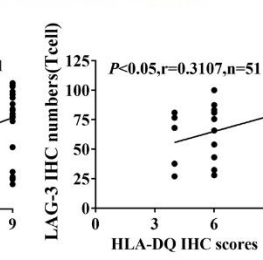

**F**

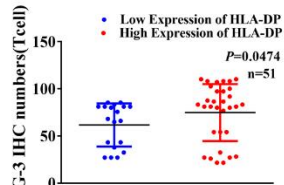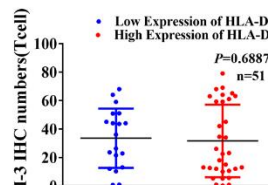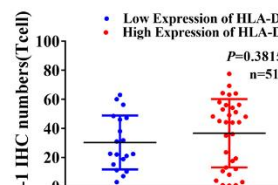

**G**

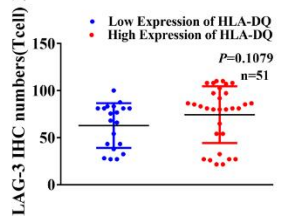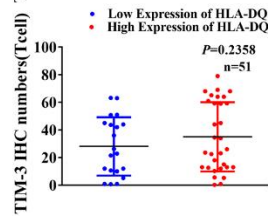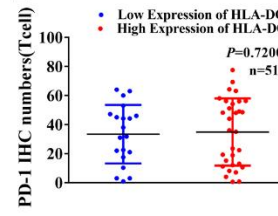

**Supplementary Figure 7. Relationship between HLA-II expression status and the number of immune checkpoint positive cells.** Data from TCGA (A) and CGGA (B) showed the correlation between HLA-DP/DQ and LAG-3 expression in GBM. (C) Representative IHC images indicate the expression of HLA-DP and DQ, CD4, and LAG-3 in the same field of GBM. (D) The correlation between HLA-DP/DQ and CD4<sup>+</sup> T cell numbers in paraffin GBM specimens was shown (n=51). (E) The correlation between HLA-DP/DQ and LAG-3<sup>+</sup> T cell numbers in paraffin GBM specimens was shown (n=51). (F) Based on IHC staining in paraffin GBM specimens, the number of LAG-3, TIM3, and PD-1 positive cells was compared between HLA-DP<sup>high</sup> and HLA-DP<sup>low</sup> groups (n=51). (G) The number of LAG-3, TIM3, and PD-1 positive cells was compared between HLA-DQ<sup>high</sup> and HLA-DQ<sup>low</sup> GBM samples (n=51).

**Fig8**

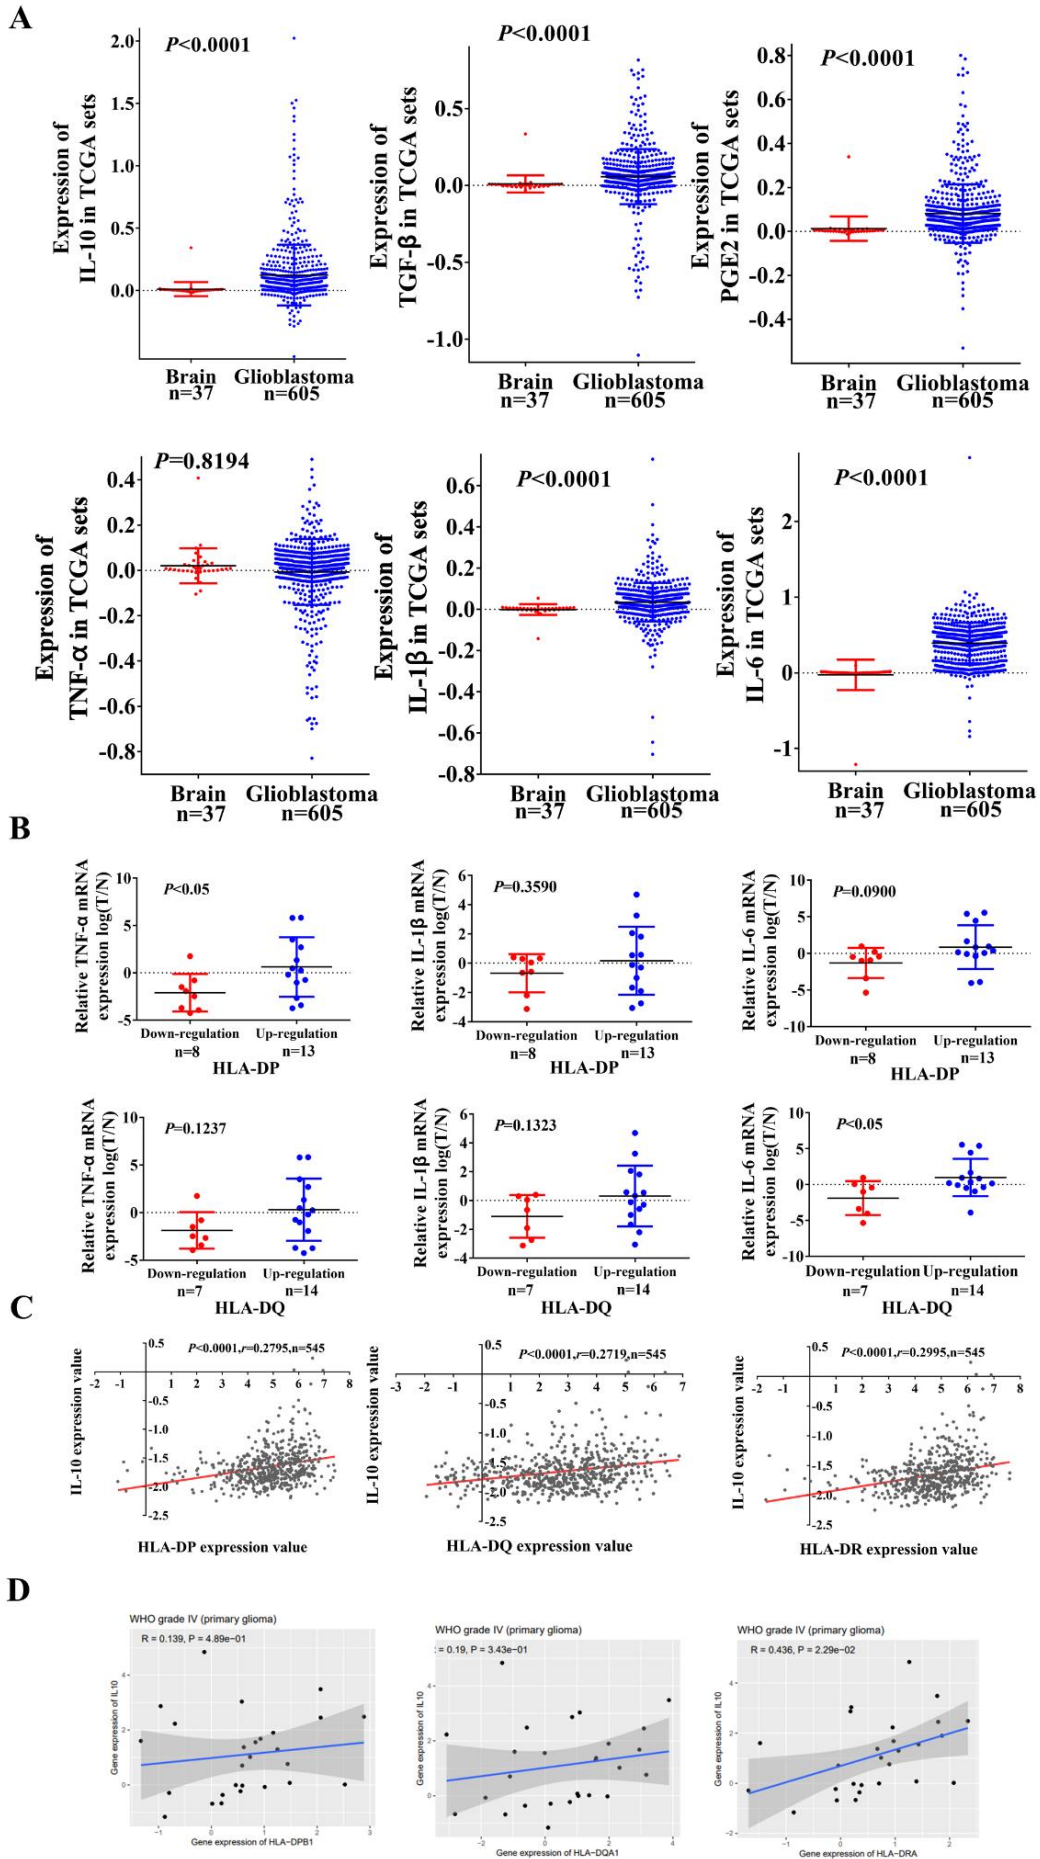

**Supplementary Figure 8. The expression of cytokines in human GBM tissues.** (A) The expression of cytokines was shown from the TCGA. (B) Based on the RT-PCR results of 21 pairs of fresh tumor tissues, the GBM tissues were divided into HLA-II upregulation and HLA-II downregulation groups. The expression of IL-1 $\beta$ , TNF- $\alpha$ , and IL-6 was compared between those two groups ( $p < 0.05$ ). Data from TCGA (C) and CGGA (D) showed the correlation between HLA-DP/DQ and IL-10 expression in GBM.

**Fig9**

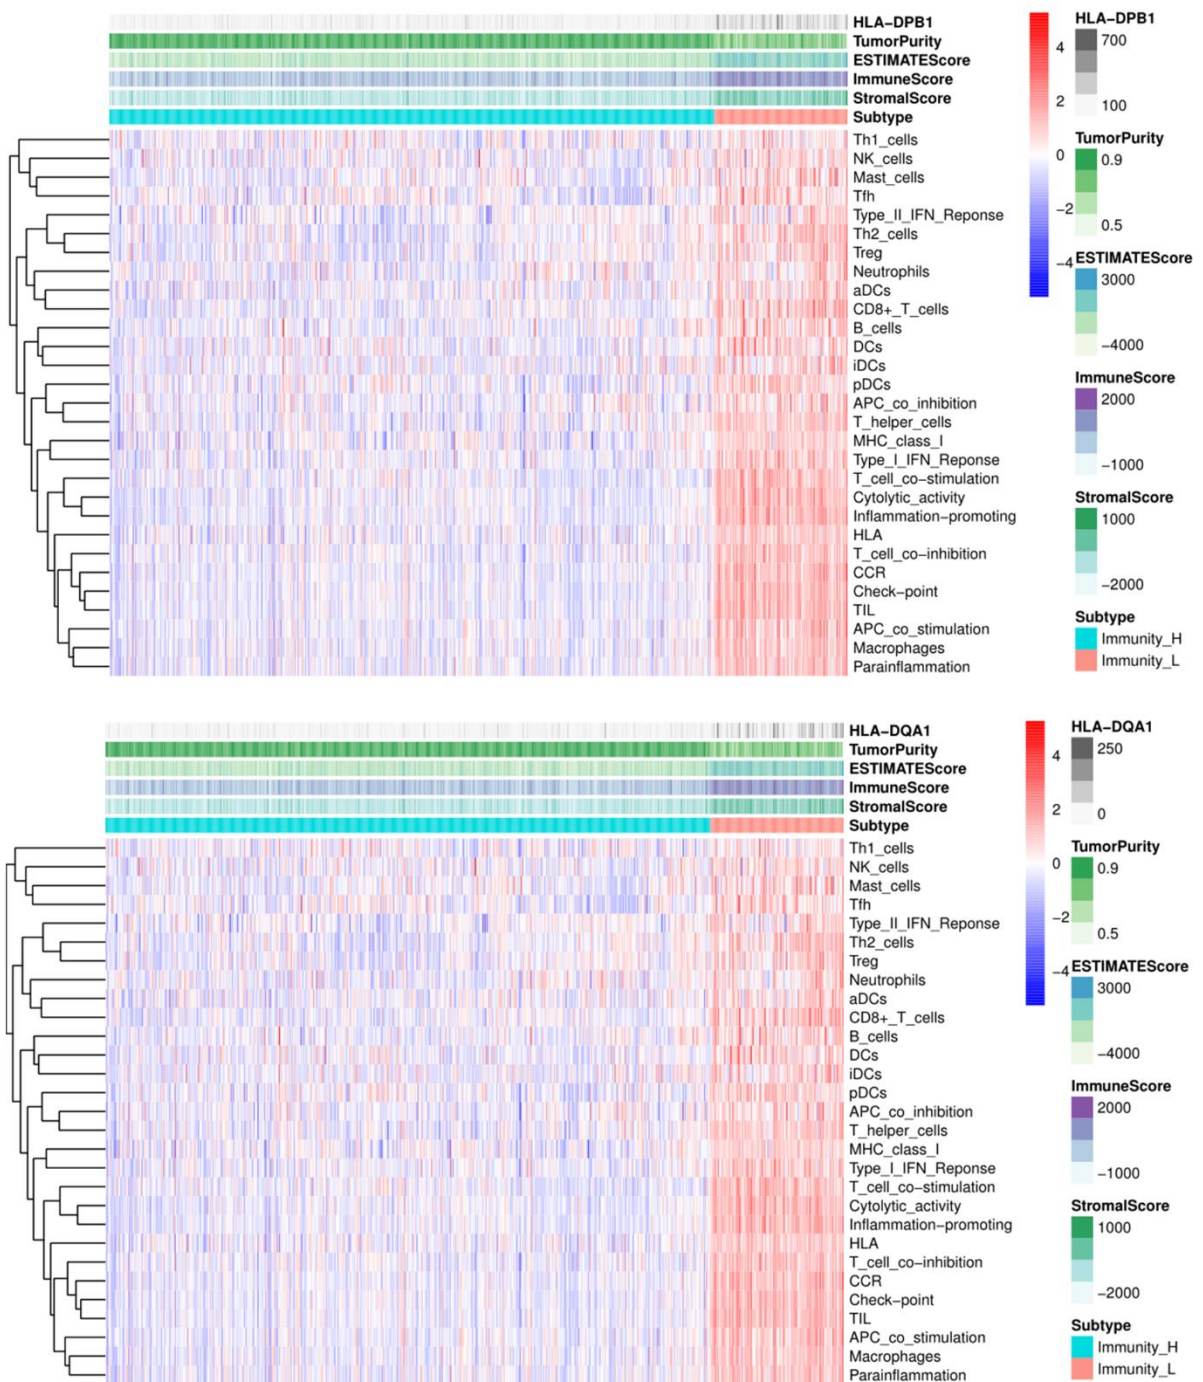

**Supplementary Figure 9.** The immune infiltration patterns based on low or high expression of HLA-II was analyzed by ssGSEA methods in GBM samples from the TCGA.



Fig10

A

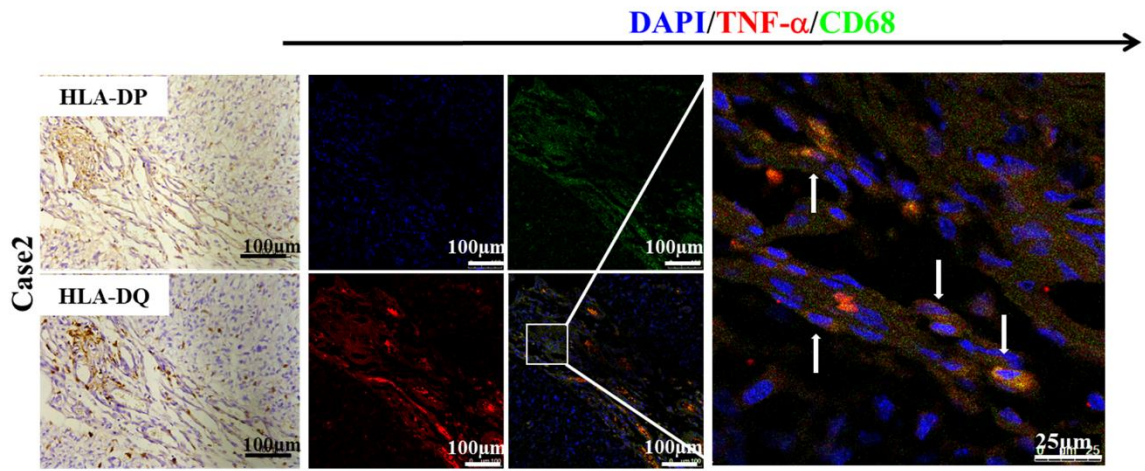

B

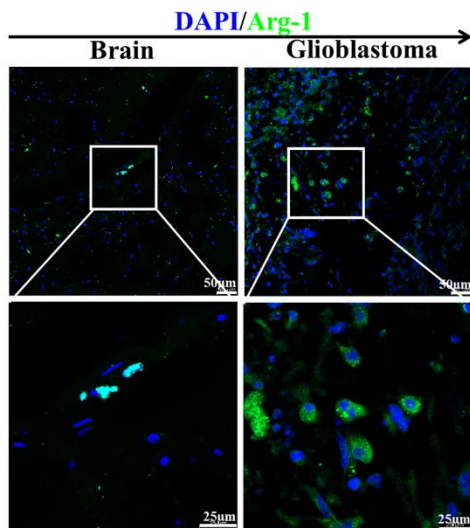

C

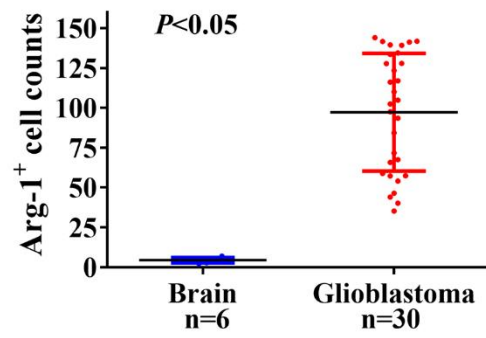

D

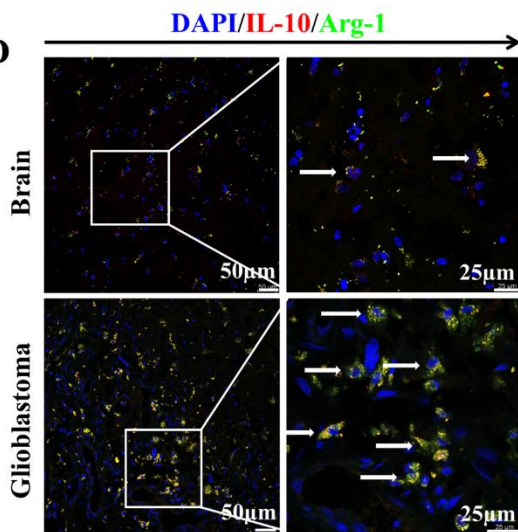

E

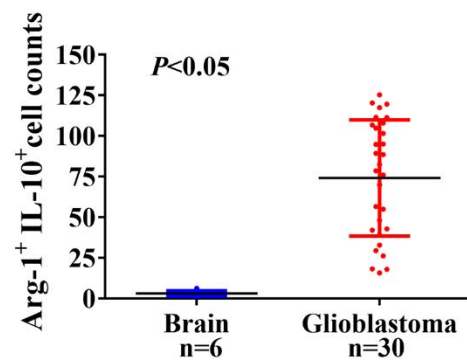

**Supplementary Figure 10.** (A) Immunofluorescence staining showed that TNF- $\alpha$  and CD68 were colocalized in the tumor stroma, which is associated with HLA-DP and HLA-DQ expression in the same field. White arrows point to the colocalized cells. (B, C) Immunofluorescence staining showed the infiltration of Arg-1<sup>+</sup> cells in GBM, and the number of Arg-1<sup>+</sup> cells was compared between GBM tissues and control brain tissues ( $p < 0.05$ ). (D, E) Immunofluorescence staining shows that IL-10 and Arg-1 are colocalized in GBM samples, and the number of IL-10<sup>+</sup>Arg-1<sup>+</sup> cells was compared between GBM and control brain samples ( $p < 0.05$ ). White arrows point to the colocalized cells.

**Fig11**

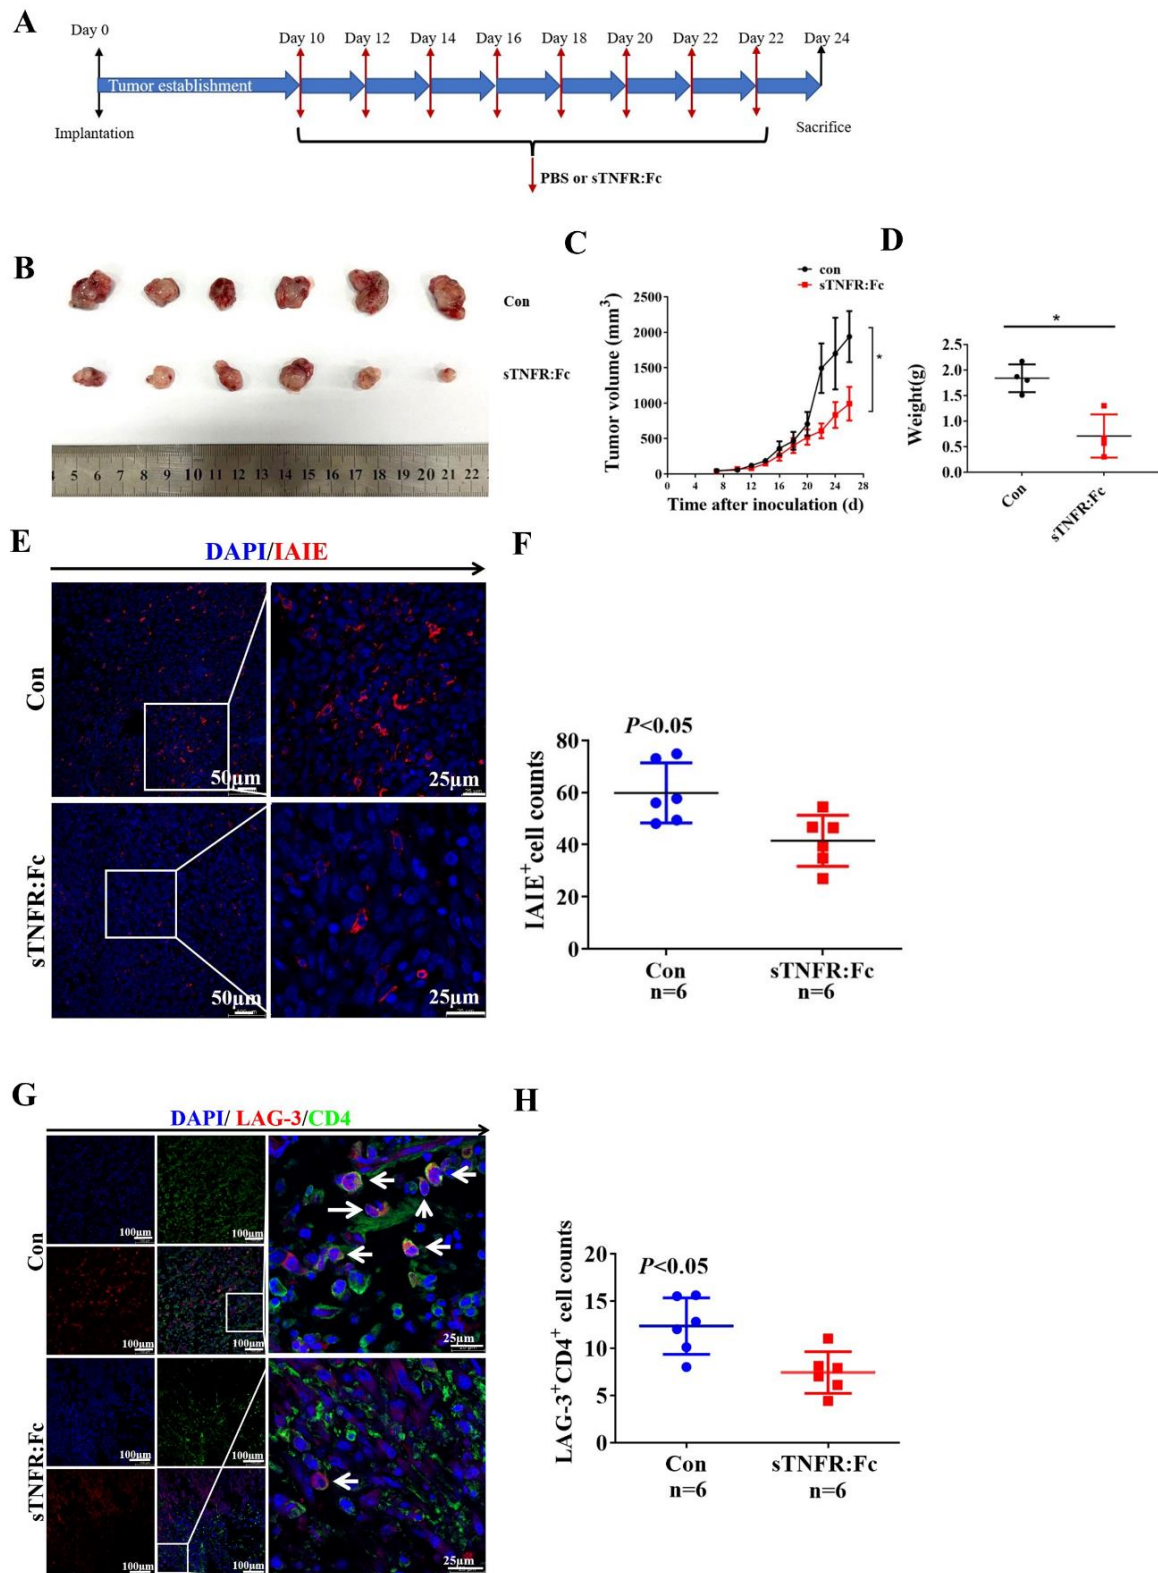

**Supplementary Figure 11. Blocking TNF- $\alpha$  inhibits GBM progression in mice model. (A) Schematic of experimental design is shown. (B) Images of tumors from**

control and *sTNFR:Fc* treatment group are shown at day 22 after injection. (C) Tumor volumes were measured every 2 days from day 12 to 22. Data were shown as mean  $\pm$  SD (n=6, \* $p$ <0.05). (D) Tumor weights were measured at day 22. Data were shown as mean  $\pm$  SD (n =6, \* $p$ <0.05). (E, F) Immunofluorescence image indicate MHC-II expression in the tumor tissues. Data were shown as mean  $\pm$  SD (n =6, \* $p$ <0.05). (G, H) Immunofluorescence image indicate that CD4<sup>+</sup>LAG-3<sup>+</sup> cells are infiltrated in the tumor tissues. Data were shown as mean  $\pm$  SD (n =6, \* $p$ <0.05).
